# Supplementary material for: The effect of aging conditions at equal OH exposure in an oxidation flow reactor on the composition of toluene-derived secondary organic aerosols
Source: Royal Society of Chemistry journal article supplement (doi:10.1039/d4ea00027g), 2024-01-01
Supplement: d4ea00027g1.pdf [file d4ea00027g1.pdf]

*Electronic Supplement Information of*

**Effect of Aging Conditions at Equal OH Exposure in an Oxidation Flow Reactor on the Composition of Toluene-derived Secondary Organic Aerosol**

*Hendryk Czech*<sup>1,2,3,\*</sup>, *Pasi Yli-Pirilä*<sup>2</sup>, *Petri Tiitta*<sup>2,a</sup>, *Mika Ihalainen*<sup>2</sup>, *Anni Hartikainen*<sup>2</sup>, *Eric Schneider*<sup>1,4</sup>,  
*Patrick Martens*<sup>1,b</sup>, *Andreas Paul*<sup>1,5</sup>, *Thorsten Hohaus*<sup>5</sup>, *Christopher P. Rieger*<sup>1,4</sup>, *Jorma Jokiniemi*<sup>2</sup>,  
*Ralf Zimmermann*<sup>1,3,4</sup>, *Olli Sippula*<sup>2,6</sup>

<sup>1</sup>Chair of Analytical Chemistry, University of Rostock, 18059, Rostock, Germany

<sup>2</sup>Fine Particle and Aerosol Technology Laboratory, Department of Environmental and Biological Science, University of Eastern Finland, 70211, Kuopio, Finland

<sup>3</sup>Cooperation Group "Comprehensive Molecular Analytics" (CMA), Helmholtz Zentrum München, 81379, München, Germany

<sup>4</sup>Department "Life, Light and Matter", University of Rostock, 18059, Rostock, Germany

<sup>5</sup>Institute of Energy and Climate Research: Troposphere (IEK-8), Forschungszentrum Jülich, 52425, Jülich, Germany

<sup>6</sup>Department of Chemistry, University of Eastern Finland, 80101, Joensuu, Finland

<sup>a</sup>now at: Envineer Oy, Kuopio, Finland

<sup>b</sup>now at: Desert Research Institute (DRI), Reno, NV, USA

\*corresponding author: [hendryk.czech@uni-rostock.de](mailto:hendryk.czech@uni-rostock.de)

**Table of Content**

|           |                                               |
|-----------|-----------------------------------------------|
| Table S1  | RO2 fate                                      |
| Table S2  | LVOC fate with full tol-SOA size distribution |
| Table S3  | LVOC fate with half tol-SOA size distribution |
| Table S4  | tol-SOA bulk composition from AMS             |
| Figure S1 | Particle number size distribution (SMPS)      |
| Figure S2 | Distribution of carbon fractions (TOCA)       |
| Figure S3 | Eigenvalues of principal components           |
| Figure S4 | ESI(±) average mass spectra                   |
| Figure S5 | #C vs. OS <sub>c</sub> from ESI- mass spectra |
| Figure S6 | Venn diagram                                  |

**Table S1.** RO<sub>2</sub> fate for “low”, “medium” and “high” OFR254 conditions resembling “safer”, “transition” and “riskier” OFR condition.

| experiment | OH     | HO <sub>2</sub> | RO <sub>2</sub> | Isomerization |
|------------|--------|-----------------|-----------------|---------------|
| low1       | 56.3 % | 43.6 %          | 0               | 0.1 %         |
| low2       | 56.3 % | 43.6 %          | 0               | 0.1 %         |
| low3       | 56.3 % | 43.6 %          | 0               | 0.1 %         |
| medium1    | 67.4 % | 32.5 %          | 0               | 0             |
| medium2    | 67.4 % | 32.5 %          | 0               | 0             |
| medium3    | 67.4 % | 32.5 %          | 0               | 0             |
| high1      | 87.9 % | 12.0 %          | 0.1 %           | 0             |
| high2      | 87.9 % | 12.0 %          | 0.1 %           | 0             |
| high3      | 87.9 % | 12.0 %          | 0.1 %           | 0             |

**Table S2.** Fraction (F) of the LVOC fate divided to condensation on particles (F<sub>par</sub>), further oxidation by OH (F<sub>OH</sub>), loss to the inner wall (F<sub>wall</sub>) or exiting OFR in gas phase (F<sub>exit</sub>) using the particle number concentration after the PEAR.

| experiment | F <sub>par</sub> | F <sub>OH</sub> | F <sub>wall</sub> | F <sub>exit</sub> |
|------------|------------------|-----------------|-------------------|-------------------|
| low1       | 91.1 %           | 4.6 %           | 2.7 %             | 1.5 %             |
| low2       | 90.9 %           | 4.9 %           | 2.7 %             | 1.5 %             |
| low3       | 84.0 %           | 7.3 %           | 3.7 %             | 5.0 %             |
| medium1    | 96.6 %           | 2.2 %           | 1.2 %             | 0.0 %             |
| medium2    | 95.6 %           | 2.9 %           | 1.5 %             | 0.1 %             |
| medium3    | 94.3 %           | 3.7 %           | 1.8 %             | 0.2 %             |
| high1      | 99.4 %           | 0.4 %           | 0.2 %             | 0.0 %             |
| high2      | 99.3 %           | 0.4 %           | 0.2 %             | 0.0 %             |
| high3      | 99.2 %           | 0.6 %           | 0.3 %             | 0.0 %             |

**Table S3.** Same as Table S3 but using half of the particle number concentration after the PEAR.

| experiment | F <sub>par</sub> | F <sub>OH</sub> | F <sub>wall</sub> | F <sub>exit</sub> |
|------------|------------------|-----------------|-------------------|-------------------|
| Low1       | 77.2 %           | 7.9 %           | 4.6 %             | 10.4 %            |
| Low2       | 76.7 %           | 8.3 %           | 4.6 %             | 10.4 %            |
| Low3       | 64.4 %           | 11.2 %          | 5.6 %             | 18.7 %            |
| Medium1    | 92.7 %           | 4.3 %           | 2.3 %             | 0.7 %             |
| Medium2    | 89.9 %           | 5.4 %           | 2.8 %             | 1.9 %             |
| Medium3    | 86.3 %           | 6.7 %           | 3.3 %             | 3.6 %             |
| High1      | 98.7 %           | 0.8 %           | 0.4 %             | 0.0 %             |
| High2      | 98.6 %           | 0.9 %           | 0.5 %             | 0.0 %             |
| High3      | 98.3 %           | 1.1 %           | 0.6 %             | 0.0 %             |

**Table S4.** Elemental bulk aerosol composition (H:C and O:C), molar ratio of organic matter to organic carbon (OM:OC) and average carbon oxidation state ( $OS_c$ ) from aerosol mass spectrometry (AMS). “x” indicate significant differences between types of tol-SOA after one-way ANOVA posthoc multiple comparisons corrected by Bonferroni method at a significance level of 0.05.

|                 | O:C  | H:C  | OM:OC | $OS_c$ |
|-----------------|------|------|-------|--------|
| low1            | 0.95 | 1.64 | 2.41  | 0.25   |
| low2            | 0.94 | 1.65 | 2.39  | 0.23   |
| low3            | 0.96 | 1.64 | 2.41  | 0.27   |
| med1            | 0.92 | 1.65 | 2.36  | 0.18   |
| med2            | 0.92 | 1.66 | 2.37  | 0.18   |
| med3            | 0.93 | 1.65 | 2.38  | 0.20   |
| high1           | 0.80 | 1.64 | 2.20  | -0.05  |
| high2           | 0.79 | 1.64 | 2.19  | -0.07  |
| high3           | 0.79 | 1.65 | 2.19  | -0.07  |
| cham1           | 0.87 | 1.48 | 2.28  | 0.26   |
| cham2           | 0.85 | 1.48 | 2.26  | 0.23   |
| cham3           | 0.85 | 1.47 | 2.26  | 0.23   |
| low vs. medium  | x    | x    | x     | x      |
| low vs. high    | x    | x    | x     | x      |
| low vs. cham    | x    | x    | x     | x      |
| medium vs.-high | x    |      | x     | x      |
| medium-vs. cham | x    |      | x     | x      |
| high vs. cham   | x    |      | x     |        |

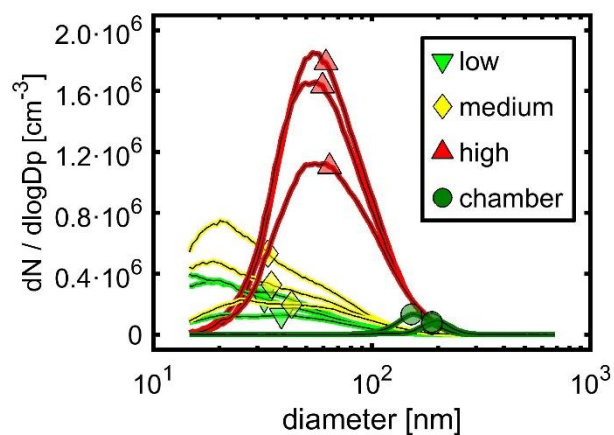

**Fig. S1** Size distribution of tol-SOA based on particle number concentration, derived from SMPS. Symbols indicate geometric mean particle diameter.

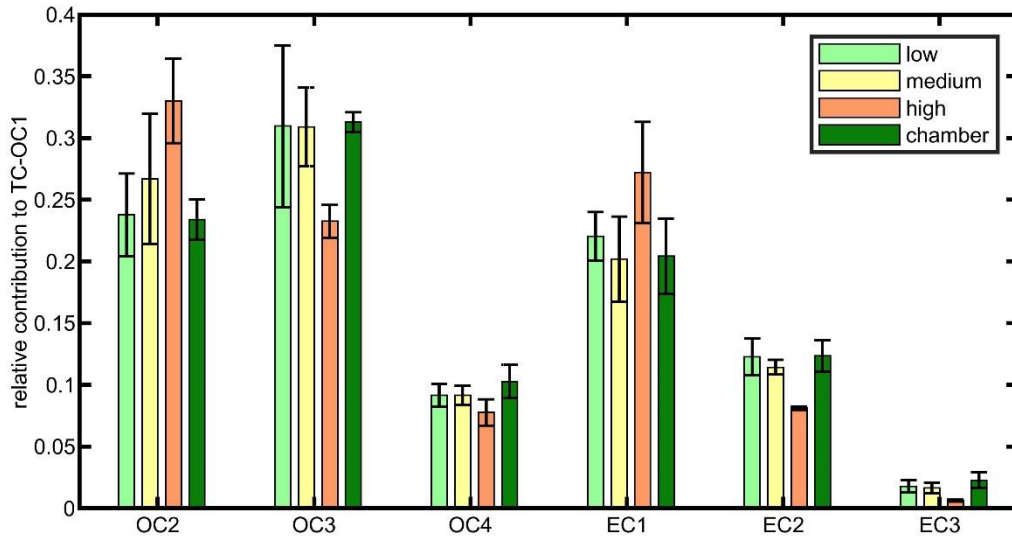

**Fig. S2** Distribution of individual carbon fraction according to *Improve\_A* protocol. OC1 was discarded from the total carbon (TC) because of likely blow-off by different sampling durations. Error bars refer to standard deviation (s.d.) and each group contains three replicates (n=3).

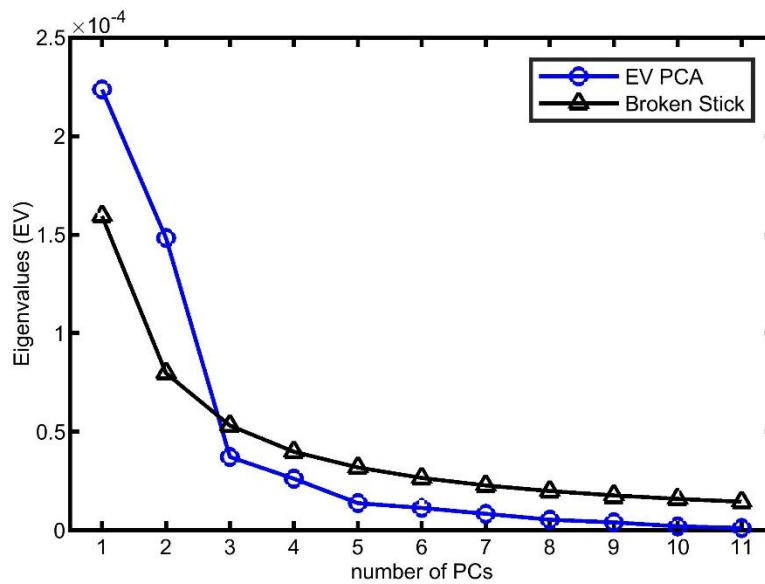

**Fig. S3** Determination of number of PCs by “broken stick” approach.

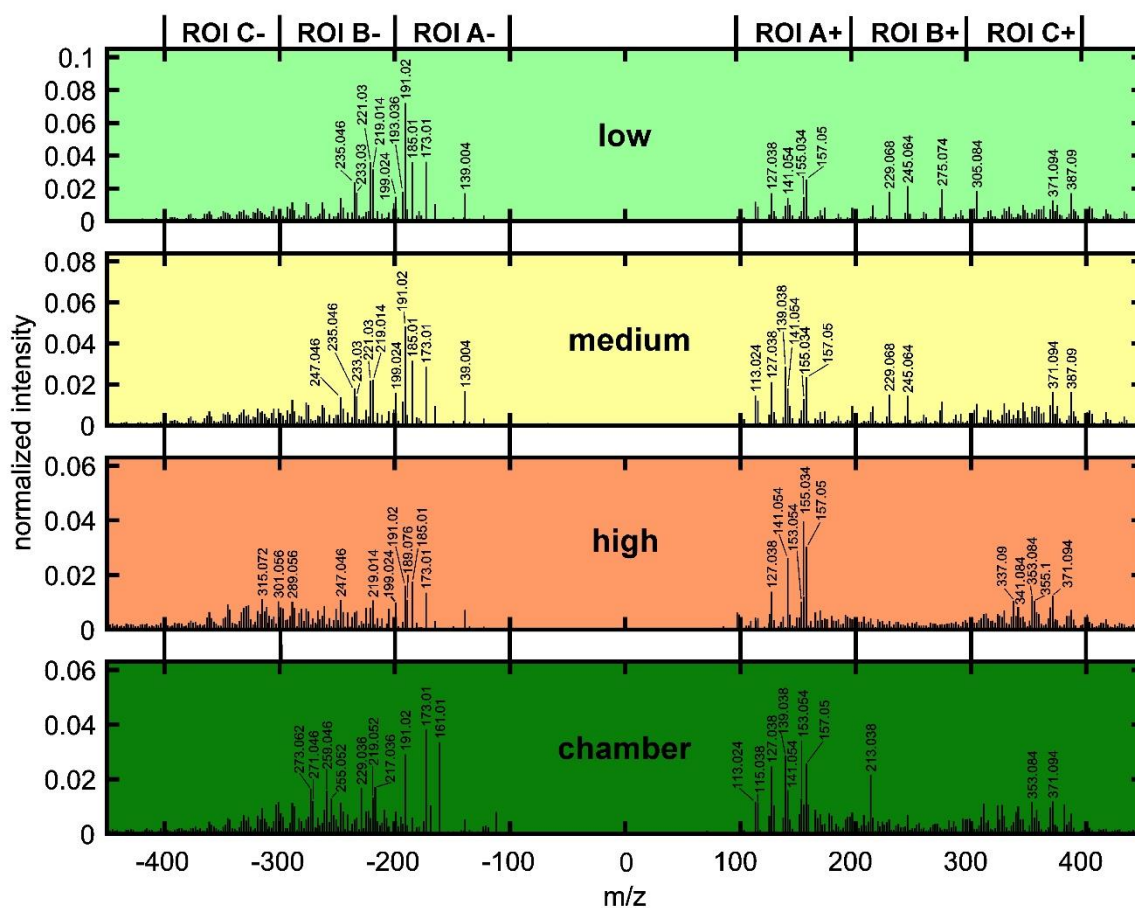

**Fig. S4** Mean mass spectra of four tol-SOA types with top 10  $m/z$  labelled by exact mass. Complete  $m/z$  range is reduced to  $\pm 450$ .  $m/z$  ranges of regions of interests (ROI) are indicated from A to C for ESI( $\pm$ ).

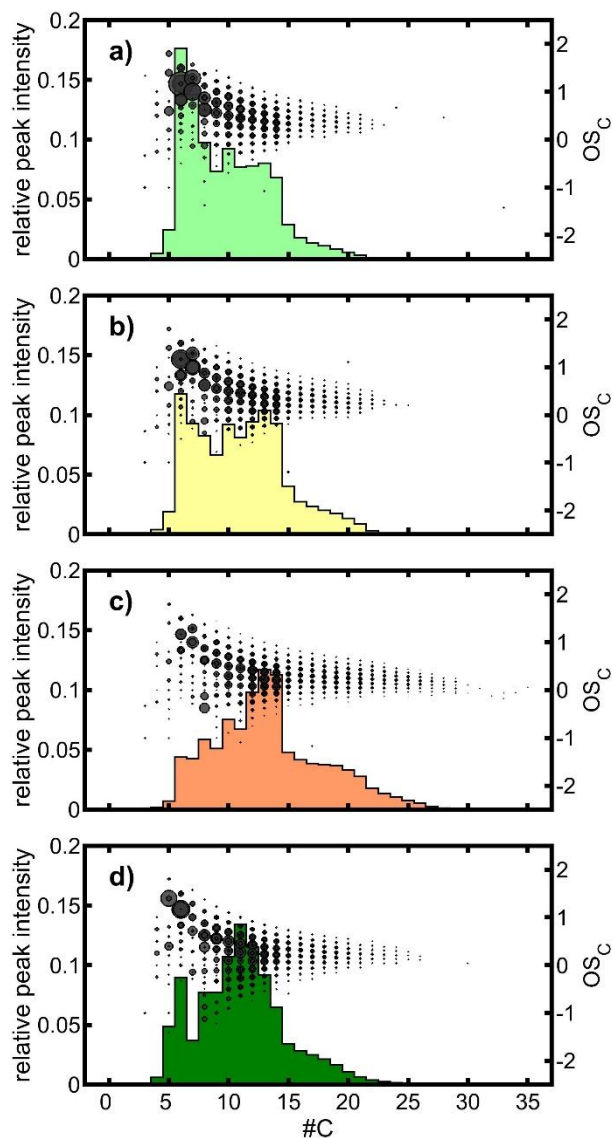

**Fig. S5** #C vs. OSC with summed relative intensities for each #C for ESI(-) of a) “low”, b) “medium”, c) “high” and d) “cham”.

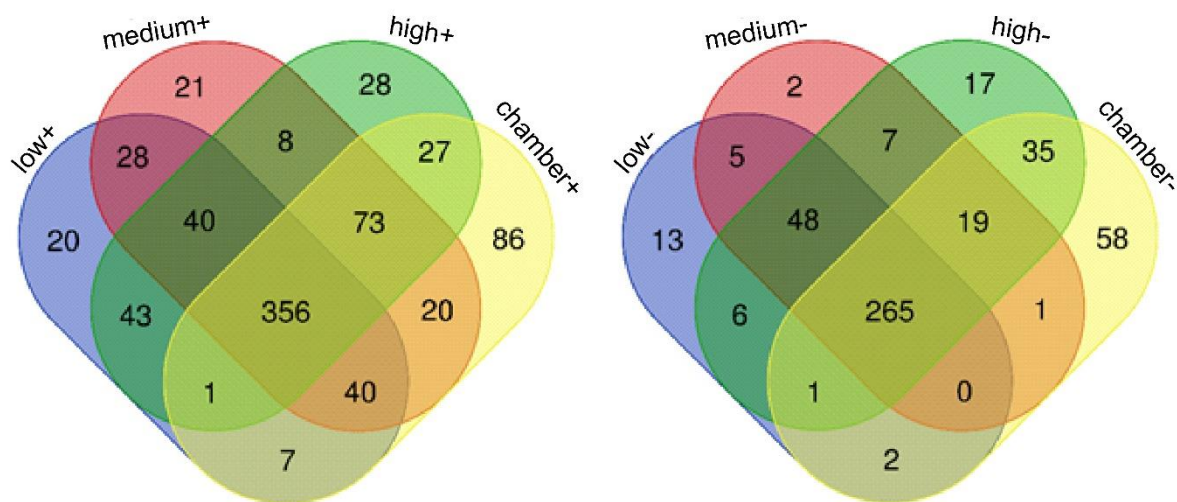

**Fig. S6** Venn diagram with sum formula with #C ≤ 15 from ESI(+) (left) and ESI(-) (right).
